# Supplementary material for: Preparation of Functional Nanoparticles-Loaded Magnetic Carbon Nanohorn Nanocomposites towards Composite Treatment
Source: MDPI journal article supplement (doi:10.3390/nano13050839), 2023-02-23
Supplement: s1 [file s1]

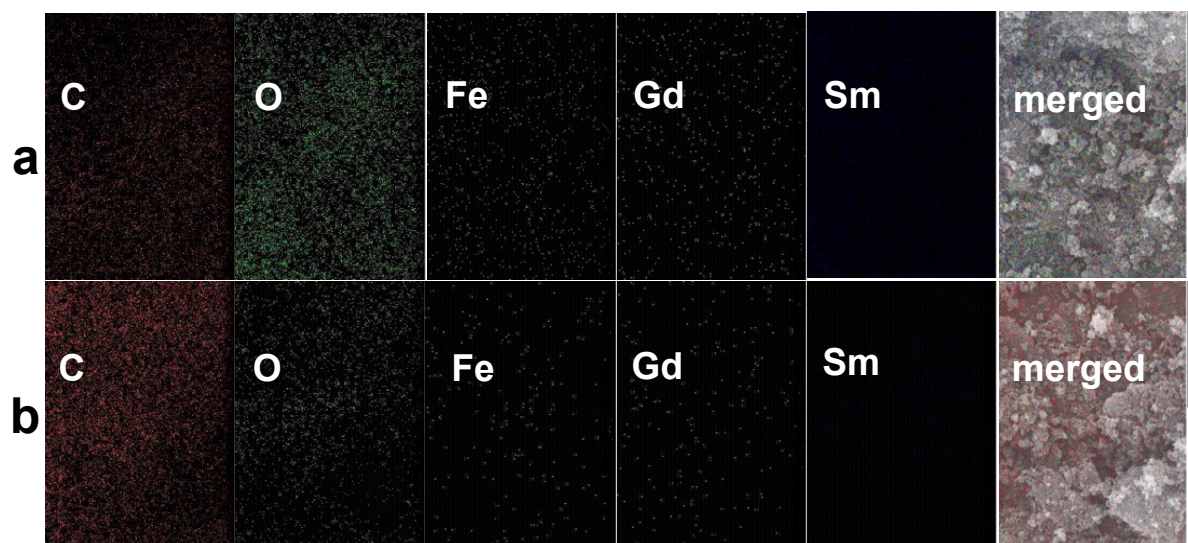

**Figure S1.** Elemental mapping of (a) CNH/Fe<sub>3</sub>O<sub>4</sub>/Sm<sub>2</sub>O<sub>3</sub>/Gd<sub>2</sub>O<sub>3</sub> and (b) CNH/Fe<sub>3</sub>O<sub>4</sub>@Cdot/Sm<sub>2</sub>O<sub>3</sub>/Gd<sub>2</sub>O<sub>3</sub>.
